# Supplementary material for: Correlation-maximizing surrogate gene space for visual mining of gene expression patterns in developing barley endosperm tissue
Source: Springer Nature journal article supplement (doi:10.1186/1471-2105-8-165), 2007-05-22

**HiT-MDS-2 scatter plot of gene expressions  
of 3031 filtered genes from Affymetrix chip at four time points (4,8,16,25 DAF)**

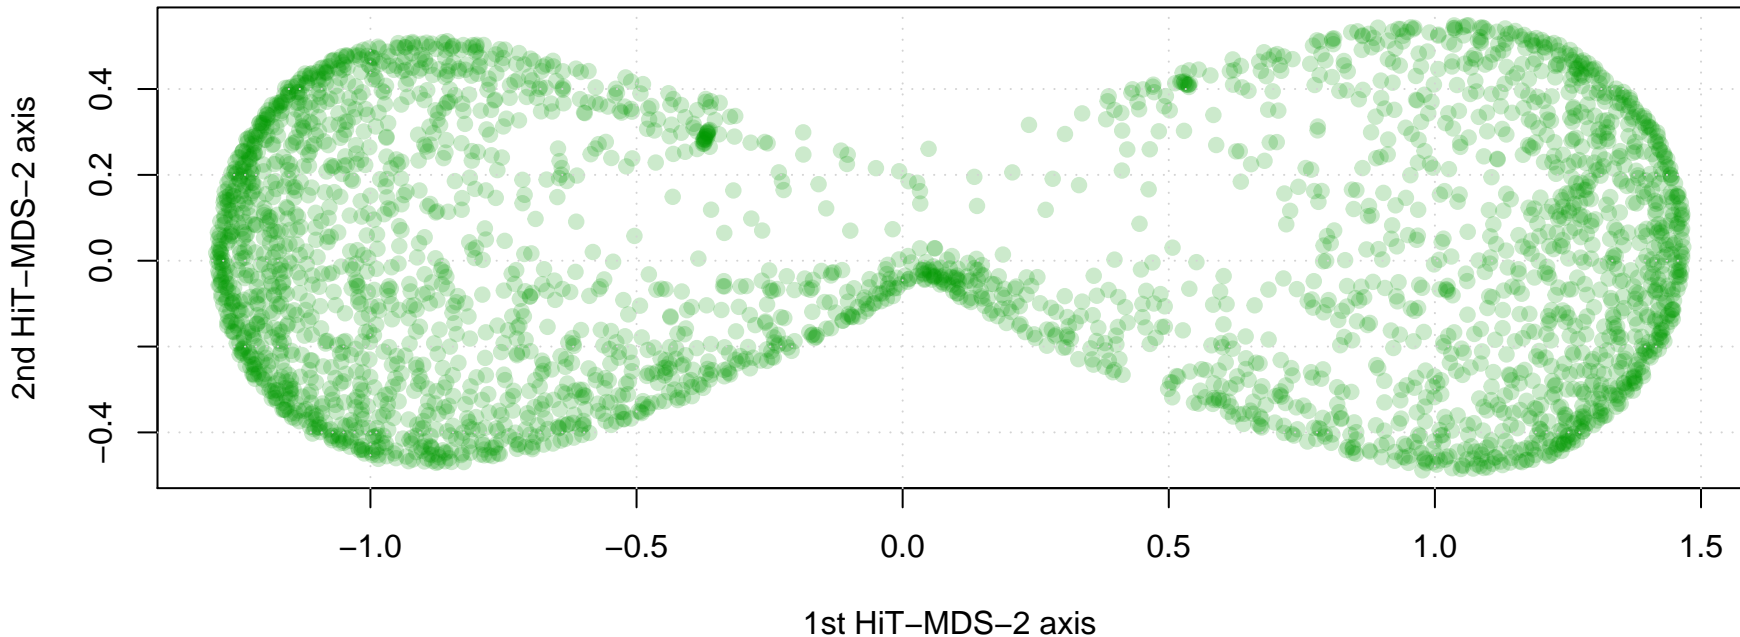

Supplement: 12859_2007_1537_MOESM4_ESM.pdf [file 12859_2007_1537_MOESM4_ESM.pdf]
