# Supplementary material for: Correlation-maximizing surrogate gene space for visual mining of gene expression patterns in developing barley endosperm tissue
Source: Springer Nature journal article supplement (doi:10.1186/1471-2105-8-165), 2007-05-22

2<sup>nd</sup> HiT-MDS-2 axis

1<sup>st</sup> HiT-MDS-2 axis

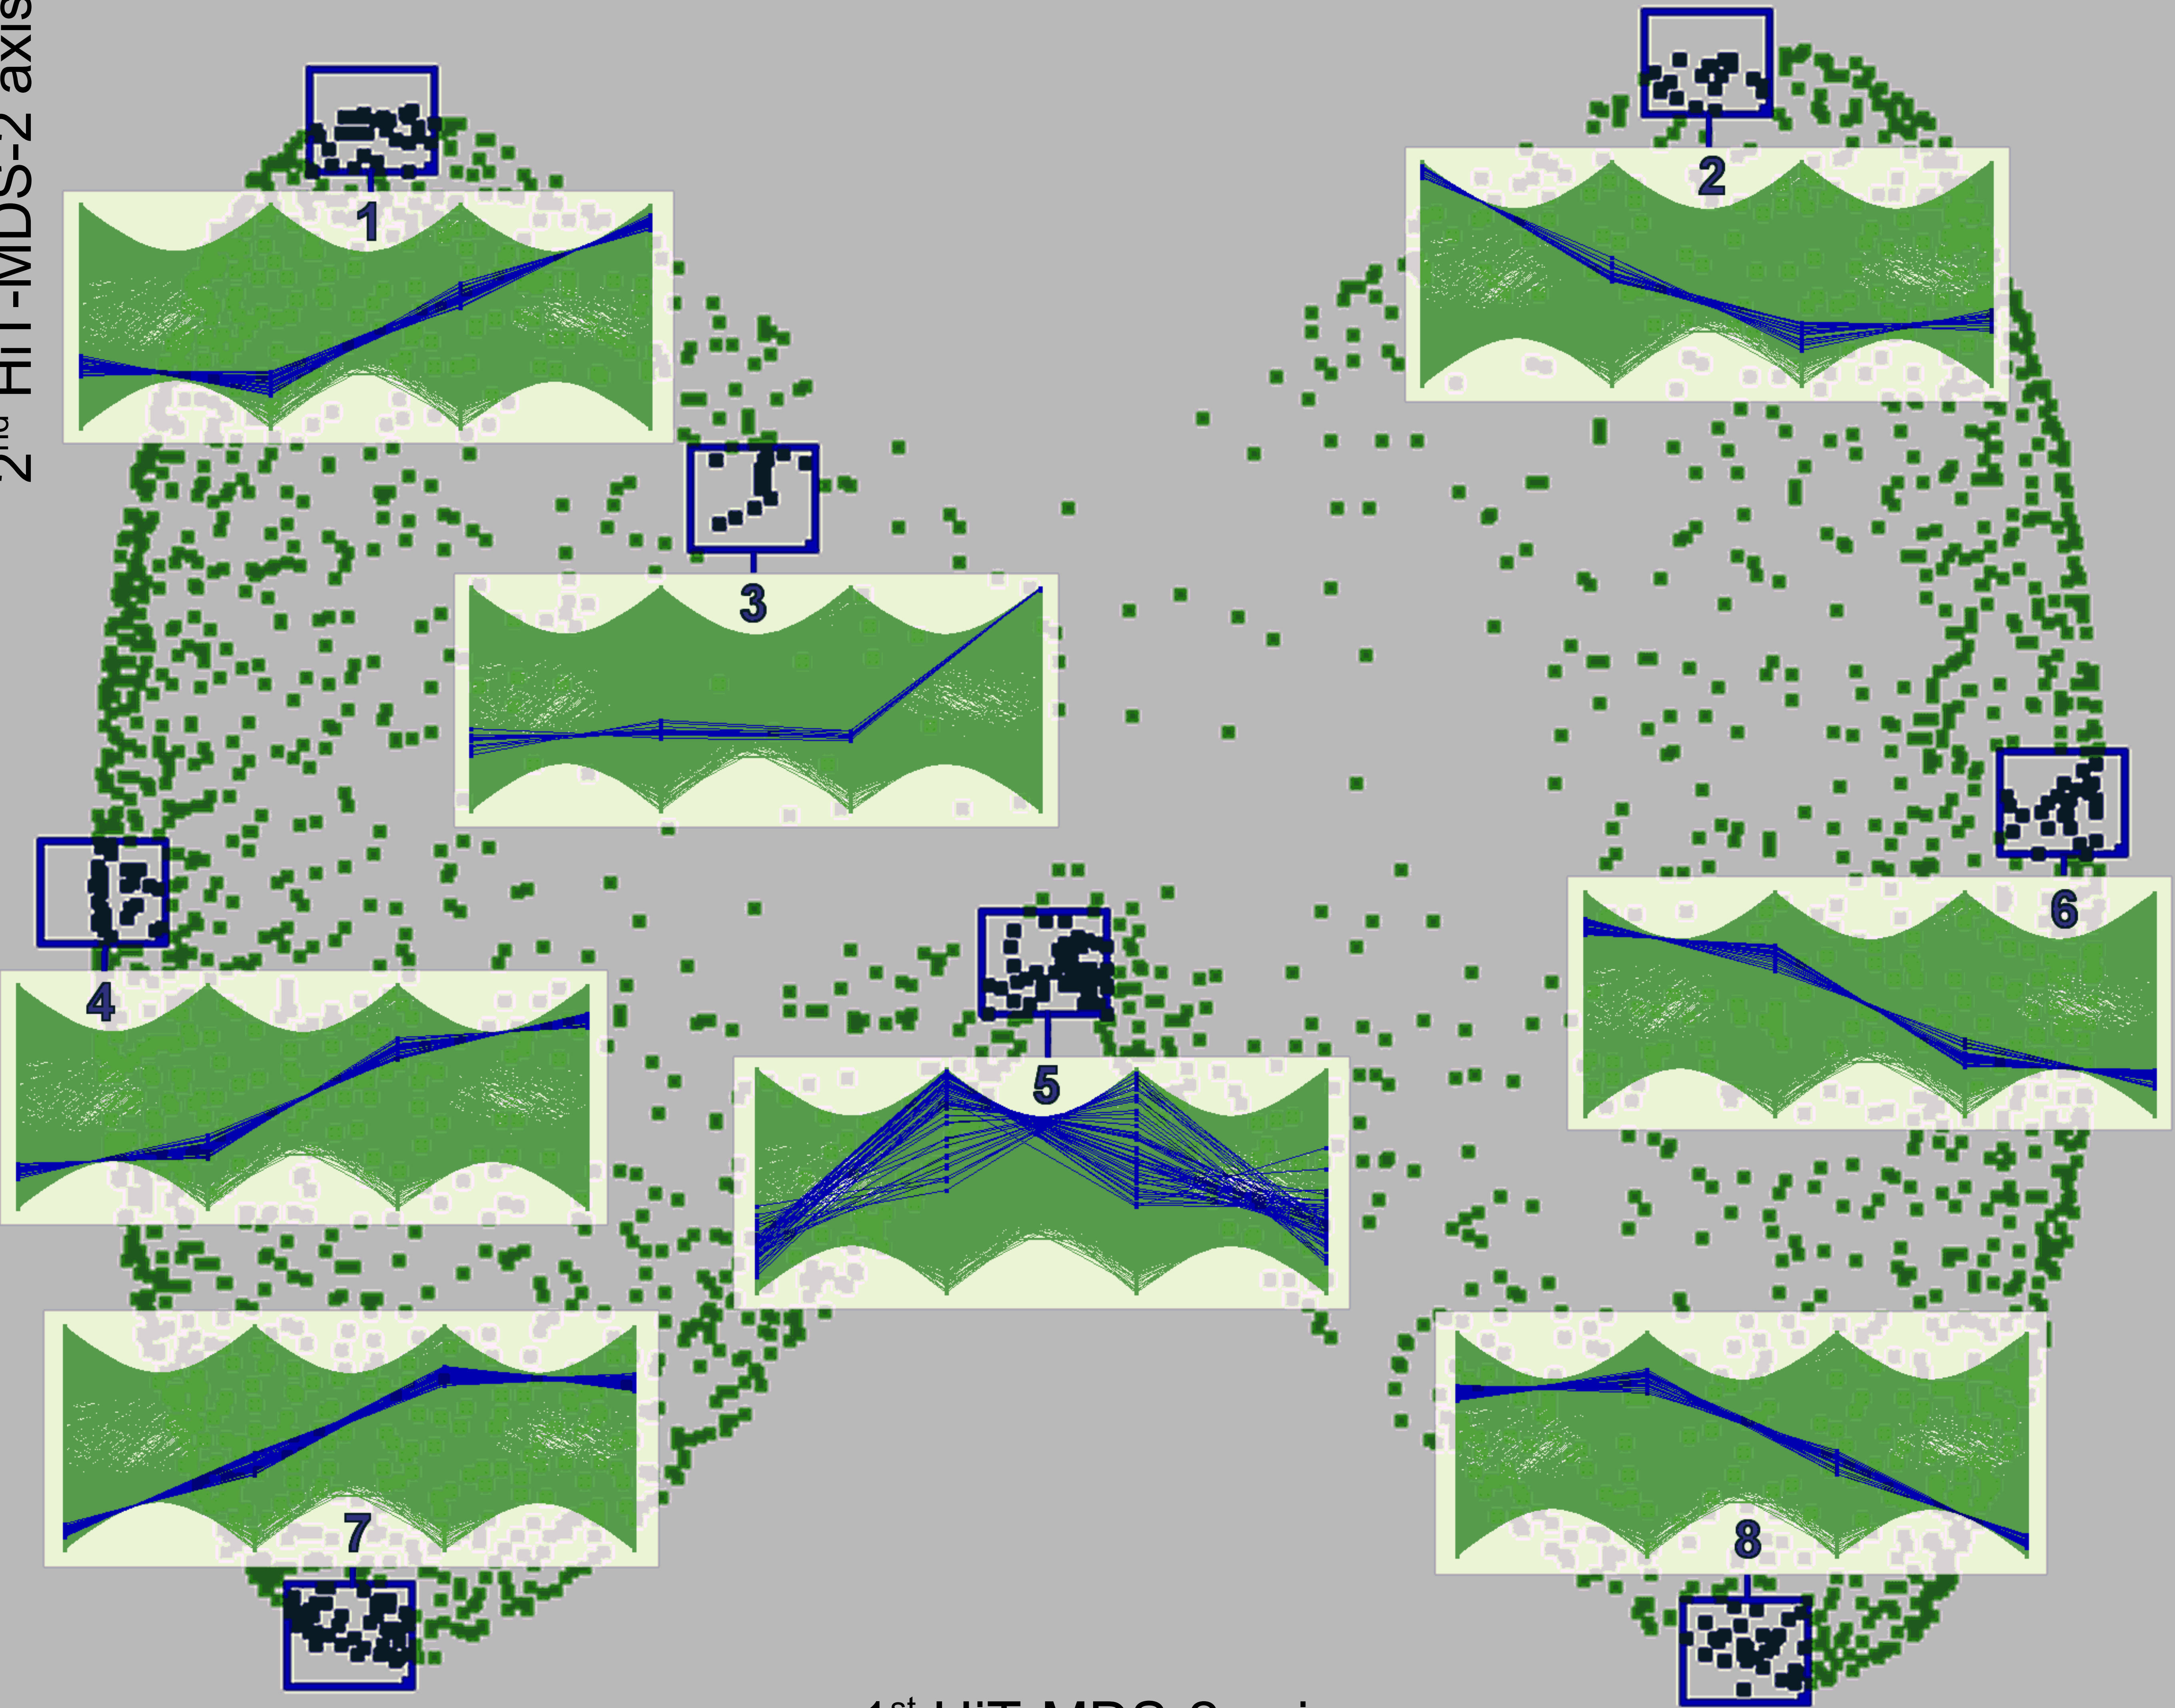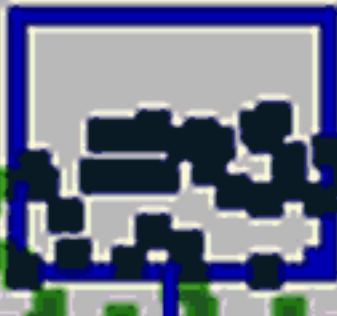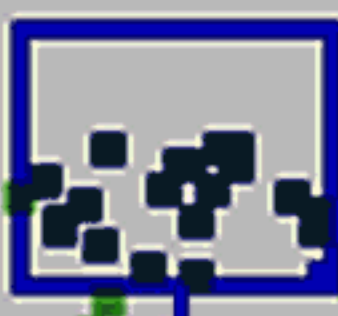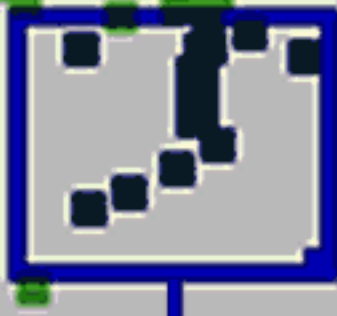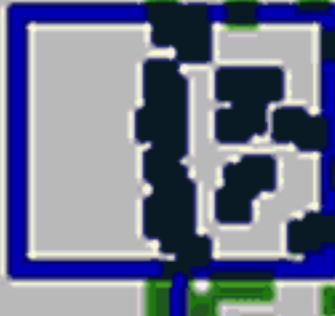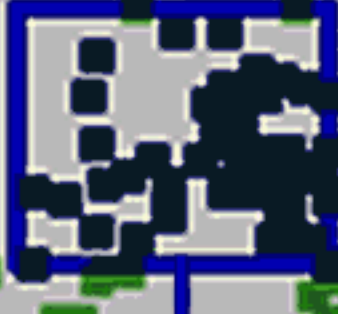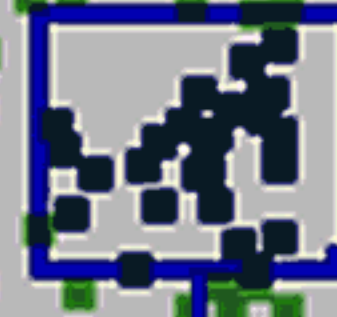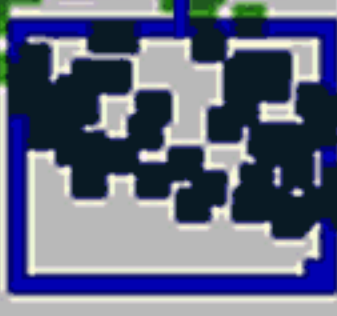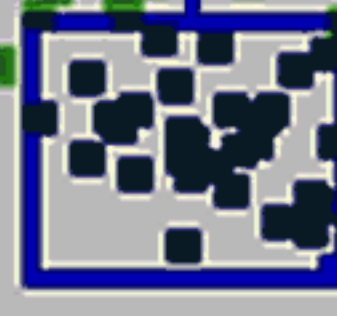

Supplement: 12859_2007_1537_MOESM5_ESM.pdf [file 12859_2007_1537_MOESM5_ESM.pdf]
