# Supplementary material for: Correlation-maximizing surrogate gene space for visual mining of gene expression patterns in developing barley endosperm tissue
Source: Springer Nature journal article supplement (doi:10.1186/1471-2105-8-165), 2007-05-22

**Cluster: 2a**

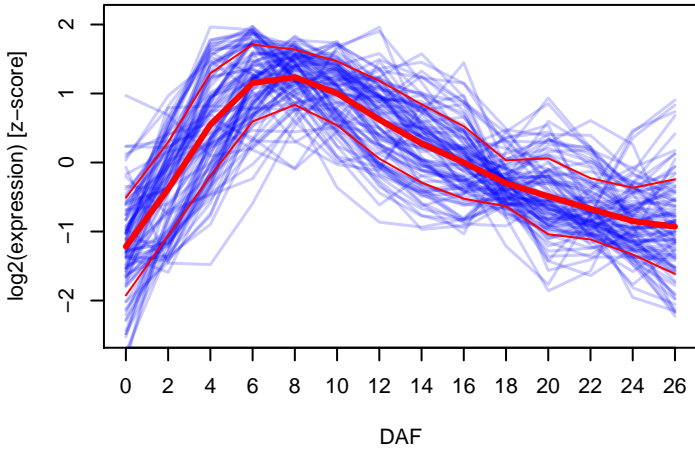

**Cluster: 2b**

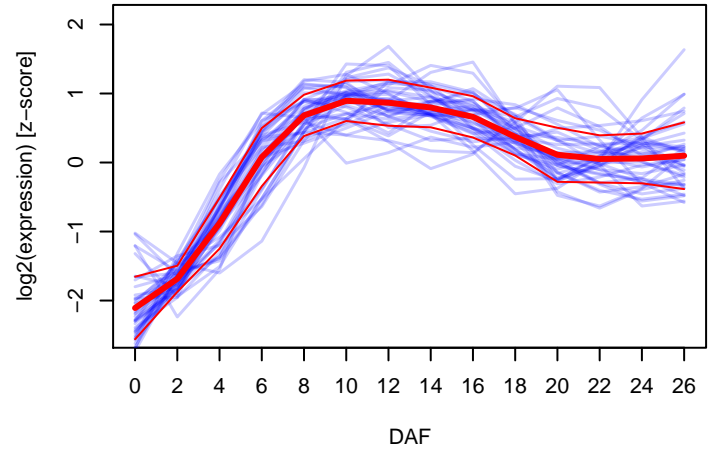

**Cluster: 3a**

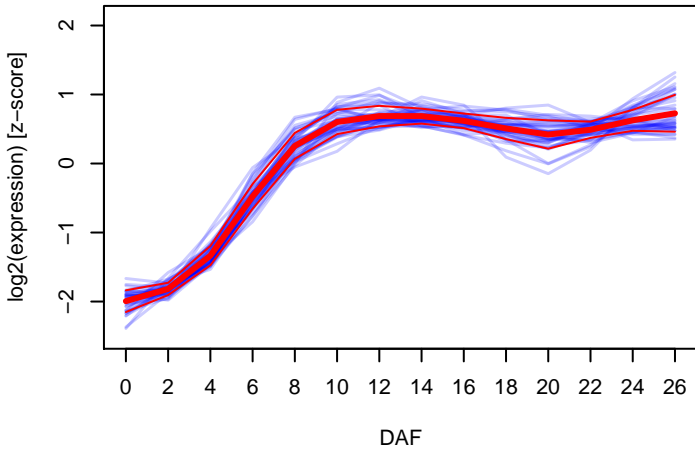

**Cluster: 3b**

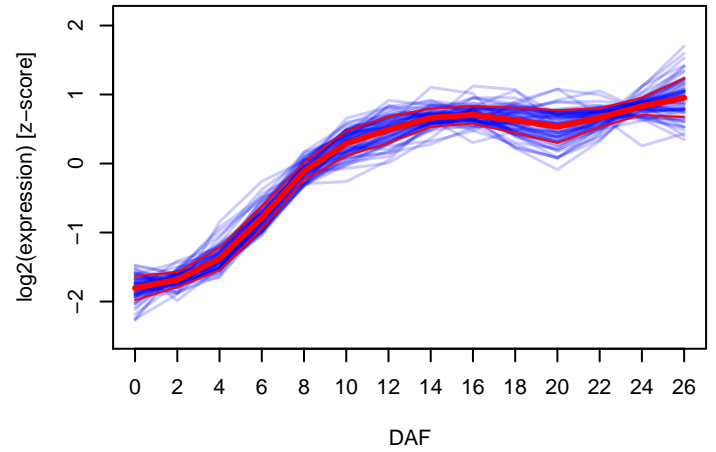

**Cluster: 4a**

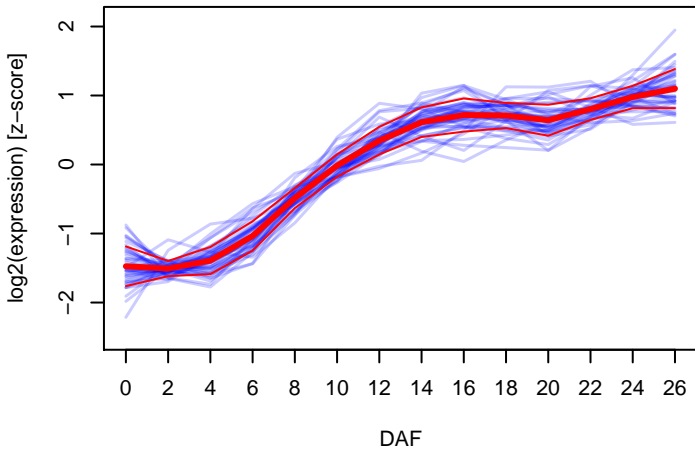

**Cluster: 4b**

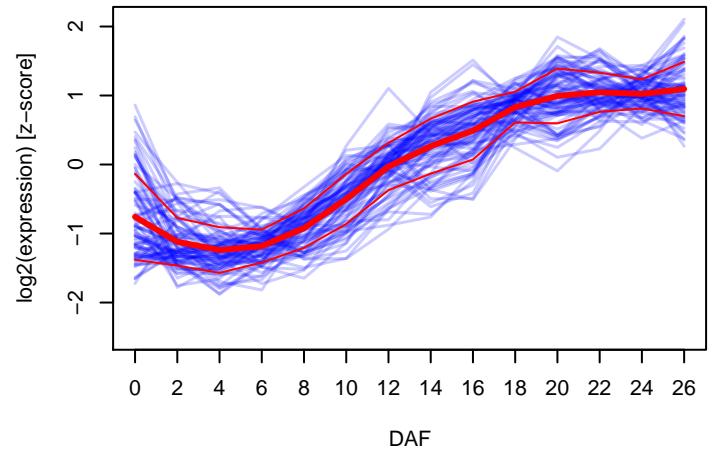

Supplement: 12859_2007_1537_MOESM6_ESM.pdf [file 12859_2007_1537_MOESM6_ESM.pdf]
